# Supplementary material
Source: MDPI journal article supplement (https://www.mdpi.com/2073-4344/7/7/204)
Supplement: s1 [file s1]

# Supplementary Materials: Acidity-Reactivity Relationships in Catalytic Esterification over Ammonium Sulfate-Derived Sulfated Zirconia

Abdallah I.M. Rabee <sup>1,2</sup>, Gamal A.H. Mekhemer <sup>1</sup>, A. Osatiashtiani <sup>2</sup>, Mark A. Isaacs <sup>2</sup>, Adam F. Lee <sup>2</sup>, Karen Wilson <sup>2,\*</sup> and Mohamed I. Zaki <sup>1</sup>

## 2. Results and Discussion

### 2.1. Catalyst Characterization

**Table S1.** Sulfate configuration and associated vibrational frequencies of IR active modes from [1].

| Structure                                                                                                                  | Symmetry        | $\nu_1$ | $\nu_2$ | $\nu_3$                        | $\nu_4$                       |
|----------------------------------------------------------------------------------------------------------------------------|-----------------|---------|---------|--------------------------------|-------------------------------|
| 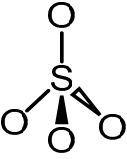<br>Free (SO <sub>4</sub> ) <sup>2-</sup> | T <sub>d</sub>  | —       | —       | 1104 (vs)                      | 613 (s)                       |
| <br>Unidentate                          | C <sub>3v</sub> | 970 (m) | 438 (m) | 1032–1044<br>1117–1143         | 645 (s)<br>664 (s)            |
| <br>Bridging bidentate                  | C <sub>2v</sub> | 995 (m) | 462 (m) | 1050–1060 (s)<br>1170–1105 (s) | 641 (s)<br>610 (s)<br>571 (m) |
| <br>Chelating bidentate                 | C <sub>2v</sub> | —       | —       | 1211,<br>1175,<br>1176         | —                             |

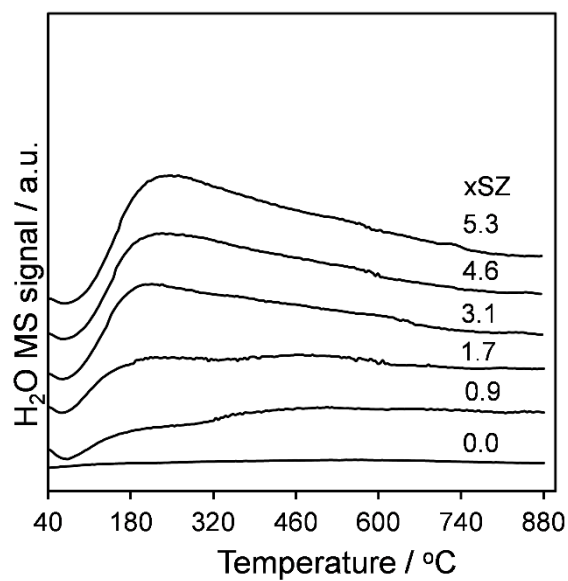

**Figure S1.** Evolved H<sub>2</sub>O ( $m/z=18$  amu) during thermal analysis of parent and sulfated zirconia as a function of bulk S loading.

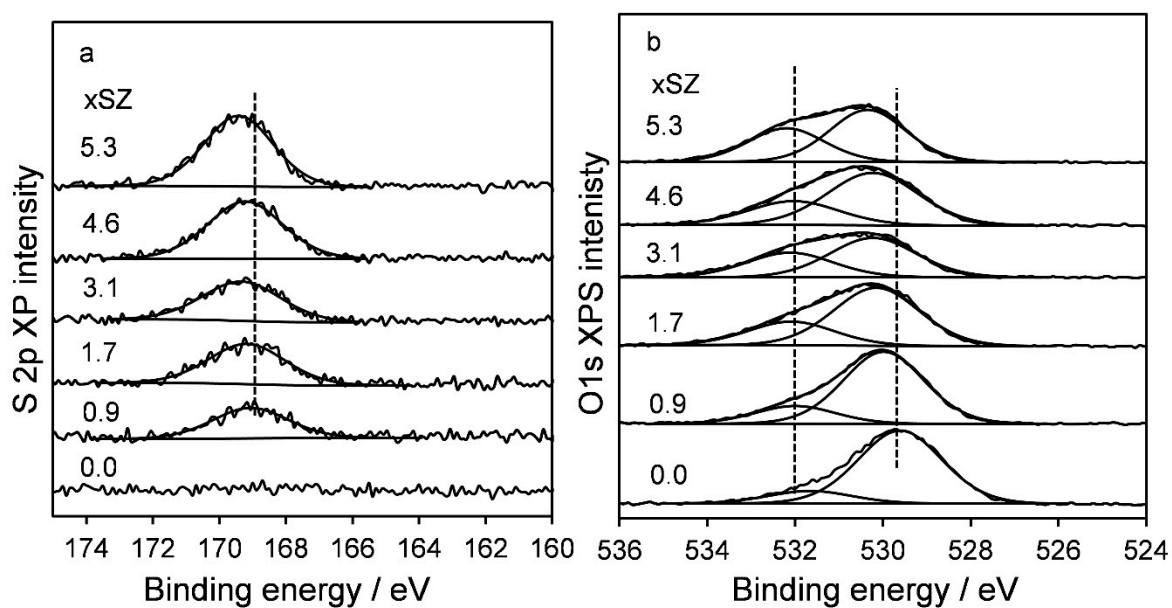

**Figure S2.** (a) S 2p and (b) O 1s XP spectra for parent and sulfated zirconia as a function of bulk S loading.

## 2.2. Surface Acidity

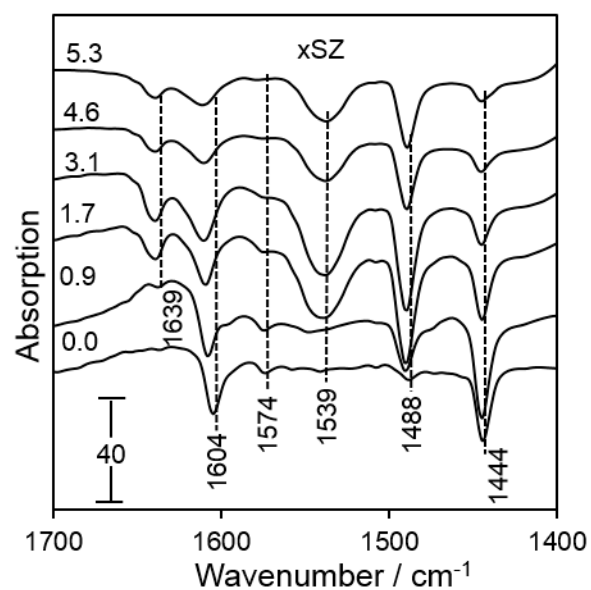

**Figure S3.** In situ IR vCCN spectra of irreversibly adsorbed pyridine at 100 °C on parent and sulfated zirconia as a function of bulk S loading.

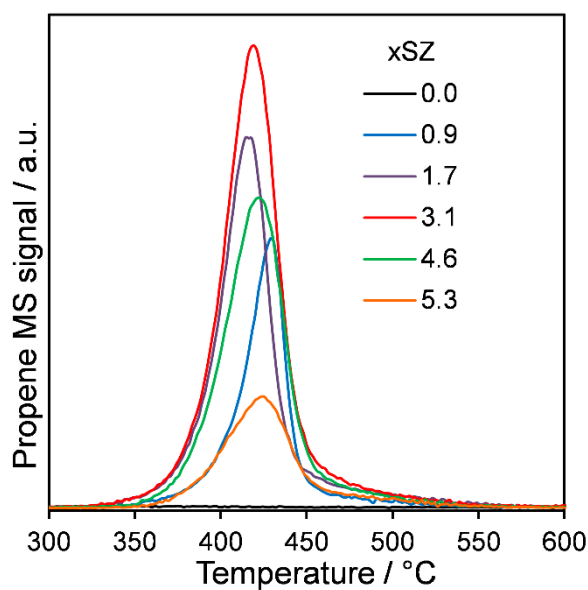

**Figure S4.** TPD profiles of adsorbed n-propylamine monitoring the release of reactively formed propene on parent and sulfated zirconia as a function of bulk S loading.

## 2.2.1. Methylbutynol Decomposition

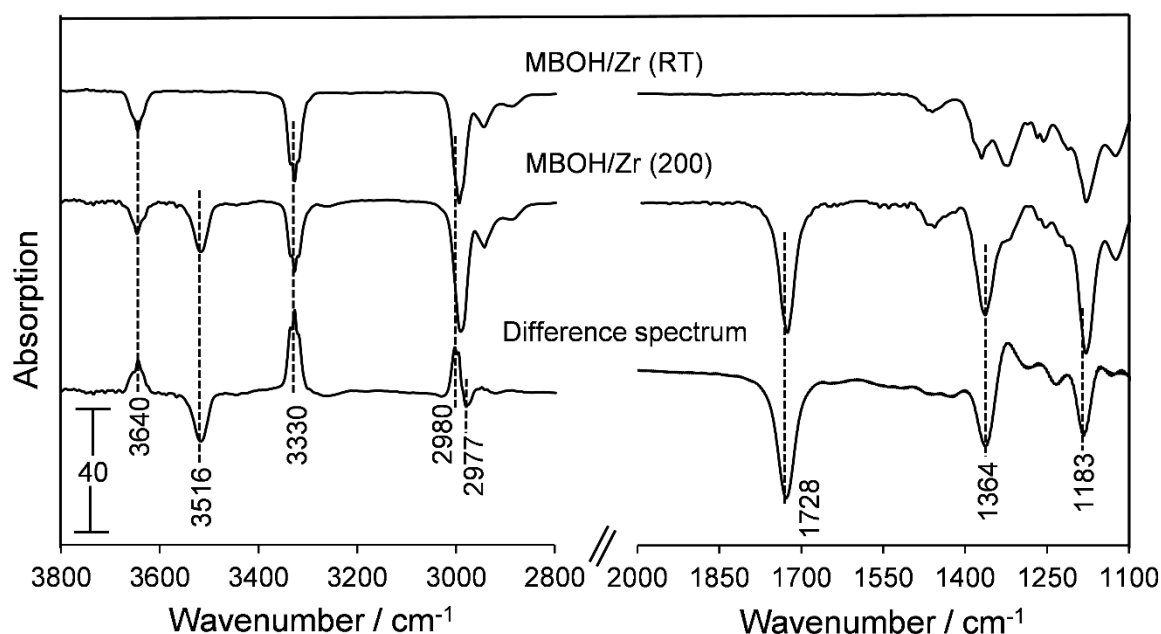

**Figure S5.** Difference IR gas phase spectra following MBOH(g) adsorption over the parent zirconia before and after heating at 200 °C for 5 min.

## 2.3. Catalytic Esterification of Propanoic Acid

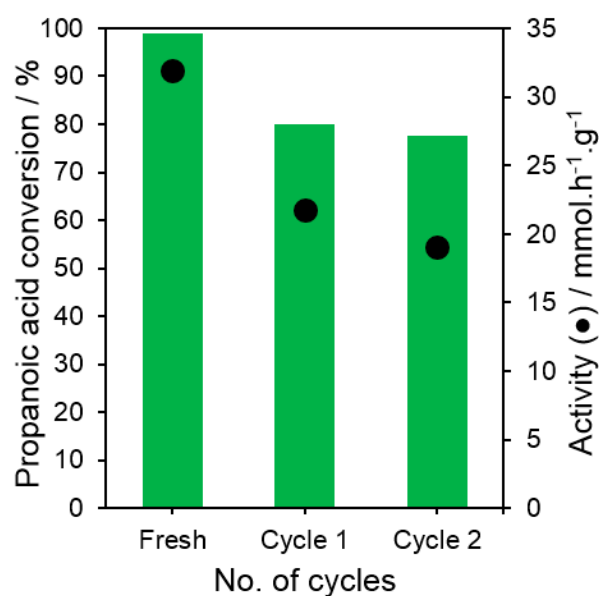

**Figure S6.** Propanoic acid conversion and mass-normalized rates of esterification of a fresh and recycled 1.7 wt % SZ catalyst.

## Reference

G. Lefèvre, In-situ Fourier-transform infrared spectroscopy studies of inorganic ions adsorption on metal oxides and hydroxides. *Adv. Colloid Interface Sci.* **2004**, *107*, 109–123.
